# Supplementary figures and images for: Effect modification of air pollution on Urinary 8-Hydroxy-2'-Deoxyguanosine by genotypes: an application of the multiple testing procedure to identify significant SNP interactions
Source: Springer Nature journal article supplement (doi:10.1186/1476-069x-9-78), 2010-12-01

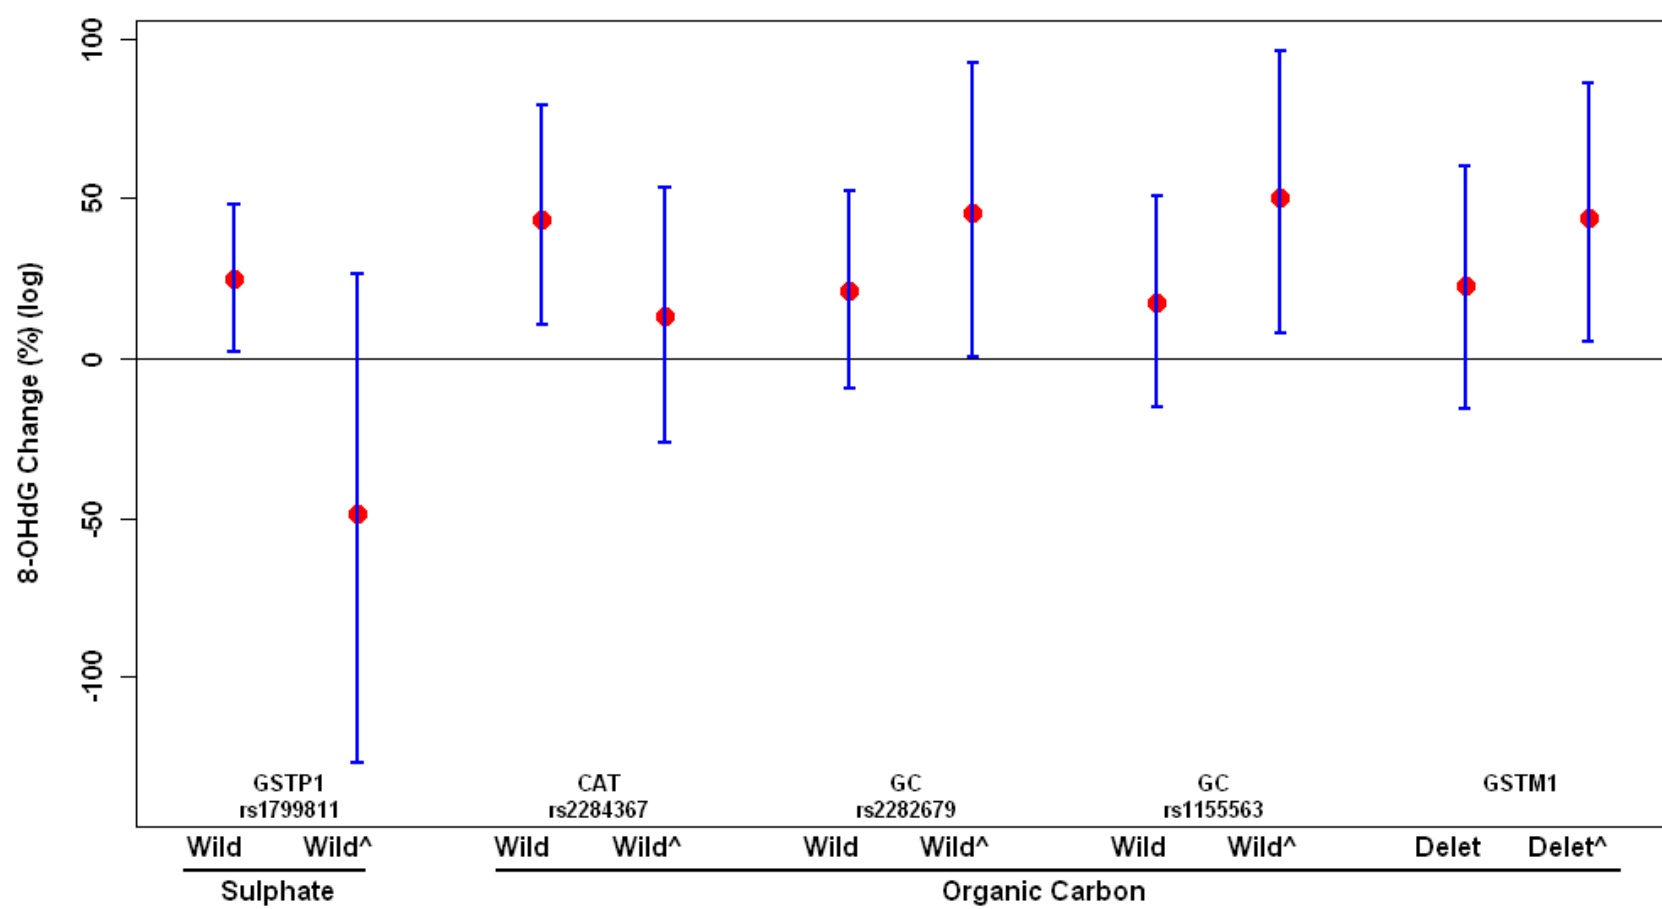

Supplement: 12940_2010_377_MOESM1_ESM.pdf [file 12940_2010_377_MOESM1_ESM.pdf]
